17 **Abstract**

18 The most critical step in the clinical diagnosis workflow is the pathological evaluation of each  
19 tumor sample. Deep learning is a powerful approach that is widely used to enhance diagnostic  
20 accuracy and streamline the diagnosis process. In our previous study using omics data, we  
21 identified two distinct subtypes of pure seminoma. Seminoma is the most common histological  
22 type of testicular germ cell tumors (TGCTs). Here we developed a deep learning decision making  
23 tool for the identification of seminoma subtypes using histopathological slides. We used all  
24 available slides for pure seminoma samples from The Cancer Genome Atlas (TCGA). The  
25 developed model showed an area under the ROC curve of 0.896. Our model not only confirms the  
26 presence of two distinct subtypes within pure seminoma but also unveils the presence of  
27 morphological differences between them that are imperceptible to the human eye.

28

29 **Keywords:** bioinformatics, computational biology, deep learning, seminoma, subtypes

30

## 31 **Introduction**

32 Testicular seminoma is the most prevalent histological subtype of testicular germ cell tumors  
33 (TGCT), accounting for the highest incidence rate among all types of testicular cancer <sup>1</sup>. TGCTs  
34 are the most frequent type of solid cancer affecting men between the ages of 15 and 44 <sup>1</sup> and rank  
35 second among adult cancers in terms of life years lost per person dying of cancer <sup>2</sup>. The treatment  
36 protocol for seminoma typically includes orchiectomy followed by either platinum-based  
37 chemotherapy utilizing cisplatin or radiation therapy <sup>3</sup>. While current treatments for seminoma  
38 have high efficacy and survival rates for patients, they also carry the risk of around 40 severe and  
39 potentially life-threatening long-term side effects, such as infertility, neurotoxicity,  
40 hypercholesterolaemia, secondary cancers and death <sup>4</sup>. The presence of elevated platinum  
41 concentrations from chemotherapy in the bloodstream can persist at levels up to 1,000 times higher  
42 than the norm for a duration of 20 years, potentially contributing to various long-term effects <sup>5</sup>.  
43 Prolonged exposure to elevated platinum levels can result in vascular damage and is highly likely  
44 to be linked with the onset of neuropathy <sup>6</sup> and cardiovascular diseases <sup>7</sup>. After undergoing  
45 chemotherapy, patients with TGCT exhibited a decrease of 3.6 dB in hearing for each additional  
46 100 mg/m<sup>2</sup> of cumulative cisplatin dose <sup>8,9</sup>. Relapse occurs in approximately 20% of seminoma  
47 cases, and the underlying reasons for this phenomenon remain unclear <sup>10</sup>, however there are several  
48 well-known seminoma risk factors such as rete testis, lymphovascular invasion, cryptorchidism,  
49 mutations in KRAS and KIT genes <sup>11,12</sup>. Patients experiencing a relapse will receive further  
50 treatment involving chemotherapy and radiation therapy, which intensify the side effects  
51 considerably. Recently we discovered two distinct subtypes of pure seminoma of the testis based  
52 on omics data <sup>13,14</sup>. Two identified seminoma subtypes revealed significant differences in the rates  
53 of loss of heterozygosity, the level of expression of lncRNA associated with cisplatin resistance,

54 the activity of double stranded DNA breaks repair mechanisms and the pluripotency stage.  
55 Seminoma subtype 1 exhibits a higher pluripotency state, while subtype 2 reveals attributes of  
56 reprogramming into non-seminomatous lineages of TGCT, which are more aggressive and require  
57 higher dose of chemotherapy drugs <sup>3</sup>. We showed that subtype 1 of seminoma, which is less  
58 differentiated, exhibits an immune microenvironment characterized by a significantly lower  
59 immune score and a larger fraction of neutrophils <sup>14</sup>. These features are indicative of the immune  
60 microenvironment at an early developmental stage. Moreover, subtype 2 revealed the  
61 overexpression of genes related to the senescence-associated secretory phenotype, which might be  
62 one of the reasons for seminoma immunotherapy failure <sup>14</sup>. Therefore, we suggested that seminoma  
63 subtype 2 might require an adjustment to its treatment strategy. The development of subtype-  
64 specific therapy for seminoma can reduce the risk of chemotherapy overtreatment in TGCT  
65 patients and enhance the quality of life for TGCT survivors.

66 Deep learning (DL) is a powerful tool capable of extracting previously hidden information directly  
67 from routine histopathology images of cancer tissue, simplifying, speeding up, and automating  
68 clinical decision-making <sup>15</sup>. The performance of modern DL methods applied to pathological data  
69 often exceeds that of human pathologists <sup>15</sup>. Most pathologists work under conditions of an  
70 extreme work overload <sup>16</sup>. An overworked pathologist can result in the misinterpretation of  
71 pathological data that affects patients' health and quality of life. DL applications aim to simplify  
72 and speed up routine pathological workflows and reduce pathologists' overload burden.

73 Here, we have developed a DL-based approach to examine potential histopathologic differences  
74 between seminoma subtypes that were previously identified using omics data. Additionally, our  
75 goal is to utilize this approach to detect and classify these subtypes based on histopathological  
76 slides. Our findings demonstrate that pure seminoma subtypes cannot be classified solely based on

77 histopathological features. However, the developed DL-based model revealed histopathological  
78 differences between these subtypes, as indicated by the area under the ROC curve (AUC) values.  
79

## 80 **Materials and Methods**

### 81 **Data set preparation**

82 We used all hematoxylin and eosin (H&E) histopathological slides available at The Cancer  
83 Genome Atlas (TCGA) data portal (TCGA-TGCT study) for 64 pure seminoma, which comprised  
84 156 whole slide images (WSIs). Based on our previous study, we assigned 40 out of 64 samples  
85 to seminoma subtype 1 (101 WSIs) and the remaining 24 samples to seminoma subtype 2 (55  
86 WSIs)<sup>13</sup>. Pure seminoma regions of interest (ROIs) were designated and verified for each WSI by  
87 a genitourinary specialized pathologist using Aperio ImageScope version 12.1. During our analysis  
88 of pure seminoma H&E slides from the TCGA portal, we identified two samples (TCGA-2G-  
89 AAG9, TCGA-2G-AAH0), initially reported as pure seminoma. However, upon further  
90 examination, they should be reclassified as mixed GCT since they contain other types of GCT  
91 (teratoma and embryonal carcinoma) in addition to seminoma (Fig.1). Consequently, these cases  
92 were removed from our data set.

93 Verified ROIs were subsequently split into smaller tiles (300x300 pixels) at a 20X magnification  
94 with a 50% overlap using DeepPath package<sup>17</sup> (Fig. 2). Tiles that contained more than 20% of  
95 background were removed. We conducted a manual check and excluded tiles of poor quality that  
96 contained out of focus images and defects, such as scratches, dirt and folded tissue. TGCTs are  
97 relatively uncommon compared to other cancers<sup>2</sup>, and therefore histopathological data availability  
98 is limited. Thus, image data augmentation technique was applied to the dataset of tiles to create  
99 synthetic variations of the images and expand the training dataset. We used the following  
100 augmentations from the Imgaug library<sup>18</sup>: random rotation by 0°, 90°, 180°, 270°, random increase  
101 and decrease of contrast, brightness and saturation.

102

## 103 **Training the model**

104 We conducted all computational experiments at the BioHPC computing facility (Lyda Hill  
105 Department of Bioinformatics, UT Southwestern Medical Center, TX, USA). TensorFlow package  
106 <sup>19</sup> version 2.5.0 was used for developing DL model based on Convolution Neural Networks  
107 (CNNs) method. The software stack for GPU acceleration included CUDA 11.2 and cuDNN 8.1.  
108 We employed a convolutional neural network with MobileNet <sup>20</sup> architecture that includes 85  
109 convolutional layers. During the training top 29 convolutional layers were kept frozen (fixed). We  
110 used sigmoid activation and the Binary Cross Entropy loss function, which is used when there are  
111 only two label classes (seminoma subtypes 1 and 2). The Adam optimizer was selected due to its  
112 superior performance in terms of both speed of convergence and accuracy <sup>21</sup> with a learning rate  
113 of 0.001. Due to imbalanced dataset we used subtype (class) weights calculated as follows:  
114  $w_1 = (1 / s_1) * (\text{total} / 2.0)$  and  $w_2 = (1 / s_2) * (\text{total} / 2.0)$ , where  $s_1$ ,  $s_2$  – number of tiles for  
115 subtypes 1 and 2, and total is overall number of tiles. The neural network was initialized from  
116 ImageNet-pretrained <sup>22</sup> weights. Model training was performed for 20 epochs with 3-fold cross-  
117 validation. Tiles belonging to a particular sample were included only in one subset of data – either  
118 training or validation.

## 119 **Statistical analysis**

120 We used the area under receiver operating characteristics (ROC, AUC) curve and accuracy as  
121 evaluation metrics to measure the tile-level and sample-level performance of the developed model.  
122 The ROC curve was defined as false-positive rate (1-specificity) on the x-axis versus true positive  
123 rate (sensitivity or recall) on the y-axis. Specificity =  $TN / (TN+FP)$ , Sensitivity =  $TP / (TP+FN)$ ,  
124 Accuracy =  $(TP+TN) / (TP+FP+TN+FN)$ , where FP, FN, TP and TN are false positives, false  
125 negatives, true positives and true negatives, respectively.

## 126 **Nuclei segmentation**

127 Nuclei segmentation of seminoma tiles was conducted using TIA Toolbox 1.4.1<sup>23</sup>. We applied the  
128 HoVer-Net model<sup>24</sup> that has been already trained on the PanNuke dataset<sup>25</sup> and incorporated in  
129 the TIA Toolbox. The calculation of nuclei size was performed using the Python library scikit-  
130 image<sup>26</sup>.

## 131 **Results and Discussion**

133 Overview of the whole experiment is shown on Figure 3. The performance of the model was  
134 evaluated using the area under the ROC curve metric (Fig. 4B) and confusion matrices (Fig. 4C).  
135 The developed model showed highest AUC = 0.896 (Fig. 4B). Trained model for identification of  
136 pure seminoma subtypes is available in open access at GitHub  
137 (<https://github.com/kirmedvedev/seminoma-subtypes>).

138 Every sample of solid tumor undergoes a detailed analysis by a professional pathologist, which  
139 includes verifying the presence of cancer tissue and annotating tumor regions. This is a crucial  
140 process in the clinical diagnosis routine. Inaccuracies in pathology reports can critically affect the  
141 quality of patient care. An audit of pathology reports showed that if a sample size of 50 gives a  
142 sample error rate of 2% there is a 95% probability that the true error rate is up to 10.9%<sup>27</sup>.  
143 Moreover, up to one-third of clinicians do not always understand pathology reports, leading  
144 to misinterpretation and uncertainty in clinical diagnosis<sup>28</sup>. DL approaches applied to  
145 histopathological slide images aim to speed up the diagnosis significantly and simplify their  
146 implementation into the clinical workflow. TGCTs and seminoma histopathology images, in  
147 particular, have not been extensively studied using DL method, and very limited studies are  
148 available nowadays. DL approaches were previously applied to TGCTs WSIs for detecting tumor-



149 infiltrating lymphocytes <sup>29</sup>, detecting lymphovascular invasion <sup>30</sup> and developing tumor/normal  
150 classifier <sup>31</sup>.

151 In this report, we present our first version of the DL decision making tool for the identification of  
152 pure seminoma subtypes using histopathological slides. We hypothesize that considering  
153 seminoma subtypes during the development of a treatment strategy may improve its clinical  
154 management, and the implementation of the developed model will enhance diagnostic accuracy  
155 and reduce potential errors. This is especially crucial when subtypes cannot be distinguished by a  
156 pathologist which is the case with pure seminoma. The developed model showed the capability to  
157 distinguish pure seminoma subtypes (Table 1), confirming our previous findings <sup>13,14</sup>. This also  
158 indicates the presence of morphological differences between seminoma subtypes. We believe that  
159 the morphological differences may be due to the difference in the immune microenvironment  
160 between the two subtypes. Previously, using deconvolution methods for bulk RNA-seq data of the  
161 seminoma subtypes from TCGA, we showed that the neutrophil fraction is significantly higher for  
162 subtype 1 <sup>14</sup>. Moreover, according to TCGA clinical data, seminoma subtype 2 revealed an  
163 increased occurrence of lymphovascular invasion, with a rate of 43% compared to 25% for subtype  
164 1. We also conducted nuclei segmentation and calculated nuclei sizes for both subtypes. Our  
165 analysis revealed no significant differences in nuclei size distributions between the seminoma  
166 subtypes (Fig. 5A, B).

167 However, the accuracy of identifying subtype 1 samples by the developed model is higher than of  
168 subtype 2 samples. This could be due to certain limitations of the model. First, the current model  
169 was developed using a limited dataset. Second, only one architecture type of CNN was tested. In  
170 future work, this model should be verified using an expanded dataset and several addition CNN  
171 architecture types.

172 **Table 1. Prediction of seminoma subtypes using developed DL model. S1 – subtype 1, S2 –**  
 173 **subtype 2.**

| Sample ID    | Transcriptomic subtype | DL model prediction | Sample ID    | Transcriptomic subtype | DL model prediction |
|--------------|------------------------|---------------------|--------------|------------------------|---------------------|
| TCGA-XY-A9T9 | S1                     | S1                  | TCGA-2G-AAH3 | S1                     | S1                  |
| TCGA-WZ-A7V4 | S1                     | S1                  | TCGA-SB-A6J6 | S1                     | S1                  |
| TCGA-2G-AAEX | S1                     | S1                  | TCGA-2G-AAHP | S1                     | S1                  |
| TCGA-2G-AAF6 | S1                     | S1                  | TCGA-VF-A8AB | S2                     | S1                  |
| TCGA-S6-A8JX | S1                     | S1                  | TCGA-ZM-AA05 | S2                     | S2                  |
| TCGA-XY-A89B | S1                     | S1                  | TCGA-XE-AANR | S2                     | S2                  |
| TCGA-2G-AAFG | S1                     | S2                  | TCGA-ZM-AA0D | S2                     | S2                  |
| TCGA-2G-AAH8 | S1                     | S1                  | TCGA-2G-AAHN | S2                     | S2                  |
| TCGA-2G-AAF1 | S1                     | S1                  | TCGA-4K-AAAL | S2                     | S1                  |
| TCGA-WZ-A7V3 | S1                     | S1                  | TCGA-VF-A8AE | S2                     | S1                  |
| TCGA-S6-A8JY | S1                     | S1                  | TCGA-ZM-AA0B | S2                     | S2                  |
| TCGA-VF-A8AA | S1                     | S1                  | TCGA-XE-AAOF | S2                     | S1                  |
| TCGA-WZ-A7V5 | S1                     | S1                  | TCGA-ZM-AA0F | S2                     | S2                  |
| TCGA-SO-A8JP | S1                     | S1                  | TCGA-2G-AAHA | S2                     | S1                  |
| TCGA-XE-A8H4 | S1                     | S1                  | TCGA-2G-AAHT | S2                     | S1                  |
| TCGA-XE-A8H5 | S1                     | S1                  | TCGA-4K-AA1H | S2                     | S2                  |
| TCGA-XE-A9SE | S1                     | S2                  | TCGA-VF-A8A9 | S2                     | S2                  |
| TCGA-XE-AANJ | S1                     | S1                  | TCGA-VF-A8AC | S2                     | S1                  |
| TCGA-XE-AANV | S1                     | S1                  | TCGA-XE-AAO6 | S2                     | S2                  |
| TCGA-XE-AAO3 | S1                     | S1                  | TCGA-XE-AAOL | S2                     | S2                  |
| TCGA-YU-A90Q | S1                     | S2                  | TCGA-YU-A90S | S2                     | S1                  |
| TCGA-YU-A90W | S1                     | S1                  | TCGA-ZM-AA06 | S2                     | S2                  |
| TCGA-YU-A912 | S1                     | S2                  | TCGA-ZM-AA0E | S2                     | S2                  |
| TCGA-S6-A8JW | S1                     | S1                  | TCGA-ZM-AA0H | S2                     | S1                  |
| TCGA-2G-AAEW | S1                     | S1                  | TCGA-ZM-AA0N | S2                     | S2                  |
| TCGA-2G-AAF4 | S1                     | S1                  | TCGA-2G-AAHL | S2                     | S1                  |
| TCGA-4K-AA1I | S1                     | S2                  | TCGA-4K-AA1G | S2                     | S2                  |
| TCGA-2G-AAFE | S1                     | S1                  |              |                        |                     |

174

175 **Conclusion**

176 In this study we developed a DL-based model to investigate the presence of histopathological  
177 distinctions between two previously identified subtypes of pure seminoma, which were initially  
178 characterized using omics data. The objective was to provide further evidence supporting the  
179 existence of seminoma subtypes. The results of our analysis revealed histopathological differences  
180 between the two subtypes of pure seminoma. These findings provide additional confirmation and  
181 support the notion that seminoma can be further stratified into distinct subtypes. These results  
182 highlight the potential of histopathological analysis as a complementary tool in subtype  
183 classification, offering additional insights alongside other omics-based approaches. However, our  
184 study also provides evidence suggesting that pure seminoma subtypes cannot be reliably classified  
185 based solely on histopathological features. Despite the observed histopathological differences  
186 between the subtypes, these distinctions alone are not sufficient for accurate subtype classification.

187

## 188 **Funding**

189 The study is supported by the grants from the National Institute of General Medical Sciences of  
190 the National Institutes of Health GM127390 (to N.V.G.), the Welch Foundation I-1505 (to  
191 N.V.G.), and the National Science Foundation DBI 2224128 (to N.V.G.).

192

## 193 **Acknowledgements**

194 Authors are grateful to Dr. Satwik Rajaram for helpful discussions. Authors are grateful to TCGA  
195 data portal for providing access to TGCT datasets. This research was supported in part by the  
196 computational resources provided by the BioHPC computing facility located in the Lyda Hill  
197 Department of Bioinformatics, UT Southwestern Medical Center, TX. URL:  
198 <https://portal.biohpc.swmed.edu>

199

200 **Conflict of interest statement**

201 The authors declare that there are no competing interests associated with the manuscript.

202

203 **Ethics statement**

204 Not applicable.

205

206 **Figures legends**

207 **Figure 1. Slide images of samples containing additional types of GCT. (A)** TCGA-2G-AAG9.

208 **(B)** TCGA-2G-AAH0. Teratoma tissue is shown in green, embryonal carcinoma in cyan.

209

210 **Figure 2. Extraction of tiles from annotated whole slide images (WSI) of two subtypes of pure**

211 **seminoma.**

212

213 **Figure 3. Overview of dataset preparation, training and validation process.**

214

215 **Figure 4. Validation statistics. (A)** Validation accuracy. **(B)** Receiver operating characteristic

216 **(ROC)** curves for validation set. **(C)** Normalized confusion matrices.

217

218 **Figure 5. Nuclei segmentation results. (A)** Visualization of nuclei segmentation results. **(B)**

219 Comparison of seminoma cell nuclei size distribution between two subtypes.

220

## 221 References

- 222 1. Ghazarian AA, Trabert B, Devesa SS, McGlynn KA. Recent trends in the incidence of  
223 testicular germ cell tumors in the United States. *Andrology*. Jan 2015;3(1):13-8.  
224 doi:10.1111/andr.288
- 225 2. Data from: Surveillance, Epidemiology, and End Results (SEER) Program SEER\*Stat  
226 Database: Incidence - SEER Research Data, 8 Registries, Nov 2021 Sub (1975-2020) - Linked To  
227 County Attributes - Time Dependent (1990-2020) Income/Rurality, 1969-2020 Counties, National  
228 Cancer Institute, DCCPS, Surveillance Research Program, released April 2023, based on the  
229 November 2022 submission.
- 230 3. Shin YS, Kim HJ. Current management of testicular cancer. *Korean J Urol*. Jan  
231 2013;54(1):2-10. doi:10.4111/kju.2013.54.1.2
- 232 4. Chovanec M, Lauritsen J, Bandak M, et al. Late adverse effects and quality of life in  
233 survivors of testicular germ cell tumour. *Nat Rev Urol*. Apr 2021;18(4):227-245.  
234 doi:10.1038/s41585-021-00440-w
- 235 5. Gerl A, Schierl R. Urinary excretion of platinum in chemotherapy-treated long-term  
236 survivors of testicular cancer. *Acta Oncol*. 2000;39(4):519-22. doi:10.1080/028418600750013447
- 237 6. Sprauten M, Darrah TH, Peterson DR, et al. Impact of long-term serum platinum  
238 concentrations on neuro- and ototoxicity in Cisplatin-treated survivors of testicular cancer. *J Clin  
239 Oncol*. Jan 20 2012;30(3):300-7. doi:10.1200/JCO.2011.37.4025
- 240 7. Boer H, Proost JH, Nuver J, et al. Long-term exposure to circulating platinum is associated  
241 with late effects of treatment in testicular cancer survivors. *Ann Oncol*. Nov 2015;26(11):2305-10.  
242 doi:10.1093/annonc/mdv369
- 243 8. Haugnes HS, Stenklev NC, Brydoy M, et al. Hearing loss before and after cisplatin-based  
244 chemotherapy in testicular cancer survivors: a longitudinal study. *Acta Oncol*. Aug  
245 2018;57(8):1075-1083. doi:10.1080/0284186X.2018.1433323
- 246 9. Frisina RD, Wheeler HE, Fossa SD, et al. Comprehensive Audiometric Analysis of  
247 Hearing Impairment and Tinnitus After Cisplatin-Based Chemotherapy in Survivors of Adult-  
248 Onset Cancer. *J Clin Oncol*. Aug 10 2016;34(23):2712-20. doi:10.1200/JCO.2016.66.8822
- 249 10. Warde P, Specht L, Horwich A, et al. Prognostic factors for relapse in stage I seminoma  
250 managed by surveillance: a pooled analysis. *J Clin Oncol*. Nov 15 2002;20(22):4448-52.  
251 doi:10.1200/JCO.2002.01.038
- 252 11. Boormans JL, Mayor de Castro J, Marconi L, et al. Testicular Tumour Size and Rete Testis  
253 Invasion as Prognostic Factors for the Risk of Relapse of Clinical Stage I Seminoma Testis Patients  
254 Under Surveillance: a Systematic Review by the Testicular Cancer Guidelines Panel. *Eur Urol*.  
255 Mar 2018;73(3):394-405. doi:10.1016/j.eururo.2017.09.025
- 256 12. Fukawa T, Kanayama HO. Current knowledge of risk factors for testicular germ cell  
257 tumors. *Int J Urol*. Apr 2018;25(4):337-344. doi:10.1111/iju.13519
- 258 13. Medvedev KE, Savelyeva AV, Chen KS, Bagrodia A, Jia L, Grishin NV. Integrated  
259 Molecular Analysis Reveals 2 Distinct Subtypes of Pure Seminoma of the Testis. *Cancer Inform*.  
260 2022;21:11769351221132634. doi:10.1177/11769351221132634
- 261 14. Savelyeva AV, Medvedev KE. Seminoma subtypes differ in the organization and  
262 functional state of the immune microenvironment. *3 Biotech*. Mar 2023;13(3):110.  
263 doi:10.1007/s13205-023-03530-1

- 264 15. Echle A, Rindtorff NT, Brinker TJ, Luedde T, Pearson AT, Kather JN. Deep learning in  
265 cancer pathology: a new generation of clinical biomarkers. *Br J Cancer*. Feb 2021;124(4):686-  
266 696. doi:10.1038/s41416-020-01122-x
- 267 16. Fritzsche FR, Ramach C, Soldini D, et al. Occupational health risks of pathologists--results  
268 from a nationwide online questionnaire in Switzerland. *BMC Public Health*. Dec 6 2012;12:1054.  
269 doi:10.1186/1471-2458-12-1054
- 270 17. Coudray N, Ocampo PS, Sakellaropoulos T, et al. Classification and mutation prediction  
271 from non-small cell lung cancer histopathology images using deep learning. *Nat Med*. Oct  
272 2018;24(10):1559-1567. doi:10.1038/s41591-018-0177-5
- 273 18. *imgaug*. 2020. Accessed accessed 01-Feb-2022. <https://github.com/aleju/imgaug>
- 274 19. Abadi M BP, Chen J, Chen Z, Davis A, Dean J, Devin M, Ghemawat S, Irving G, Isard M,  
275 Kudlur M. TensorFlow: a system for Large-Scale machine learning. presented at: In 12th USENIX  
276 symposium on operating systems design and implementation (OSDI 16); 2016;
- 277 20. Andrew G. Howard MZ, Bo Chen, Dmitry Kalenichenko, Weijun Wang, Tobias Weyand,  
278 Marco Andreetto, Hartwig Adam. MobileNets: Efficient Convolutional Neural Networks for  
279 Mobile Vision Applications. *arXiv*. 2017;doi:<https://doi.org/10.48550/arXiv.1704.04861>
- 280 21. Kingma DP BJ. Adam: A method for stochastic optimization. *arXiv*.  
281 2014;doi:<https://doi.org/10.48550/arXiv.1412.6980>
- 282 22. Deng J DW, Socher R, Li LJ, Li K, Fei-Fei L. Imagenet: A large-scale hierarchical image  
283 database. presented at: In 2009 IEEE conference on computer vision and pattern recognition 2009  
284 Jun 20; 2009;
- 285 23. Pocock J, Graham S, Vu QD, et al. TIAToolbox as an end-to-end library for advanced  
286 tissue image analytics. *Commun Med (Lond)*. 2022;2:120. doi:10.1038/s43856-022-00186-5
- 287 24. Graham S, Vu QD, Raza SEA, et al. Hover-Net: Simultaneous segmentation and  
288 classification of nuclei in multi-tissue histology images. *Med Image Anal*. Dec 2019;58:101563.  
289 doi:10.1016/j.media.2019.101563
- 290 25. Jevgenij Gamper NAK, Ksenija Benes, Simon Graham, Mostafa Jahanifar, Syed Ali  
291 Khurram, Ayesha Azam, Katherine Hewitt, Nasir Rajpoot. PanNuke Dataset Extension, Insights  
292 and Baselines. *arXiv*. 2020;doi:10.48550/arXiv.2003.10778
- 293 26. van der Walt S, Schonberger JL, Nunez-Iglesias J, et al. scikit-image: image processing in  
294 Python. *PeerJ*. 2014;2:e453. doi:10.7717/peerj.453
- 295 27. Ramsay AD. Errors in histopathology reporting: detection and avoidance. *Histopathology*.  
296 Jun 1999;34(6):481-90. doi:10.1046/j.1365-2559.1999.00719.x
- 297 28. Mirham L HJ, Yousef GM. Addressing the diagnostic miscommunication in pathology:  
298 old challenges and innovative solutions. *American Journal of Clinical Pathology*.  
299 2021;156(4):521-528. doi:<https://doi.org/10.1093/ajcp/aqab014>
- 300 29. Linder N, Taylor JC, Colling R, et al. Deep learning for detecting tumour-infiltrating  
301 lymphocytes in testicular germ cell tumours. *J Clin Pathol*. Feb 2019;72(2):157-164.  
302 doi:10.1136/jclinpath-2018-205328
- 303 30. Ghosh A, Sirinukunwattana K, Khalid Alham N, et al. The Potential of Artificial  
304 Intelligence to Detect Lymphovascular Invasion in Testicular Cancer. *Cancers (Basel)*. Mar 16  
305 2021;13(6)doi:10.3390/cancers13061325
- 306 31. Noorbakhsh J, Farahmand S, Foroughi Pour A, et al. Deep learning-based cross-  
307 classifications reveal conserved spatial behaviors within tumor histological images. *Nat Commun*.  
308 Dec 11 2020;11(1):6367. doi:10.1038/s41467-020-20030-5
- 309





311 **Figures**

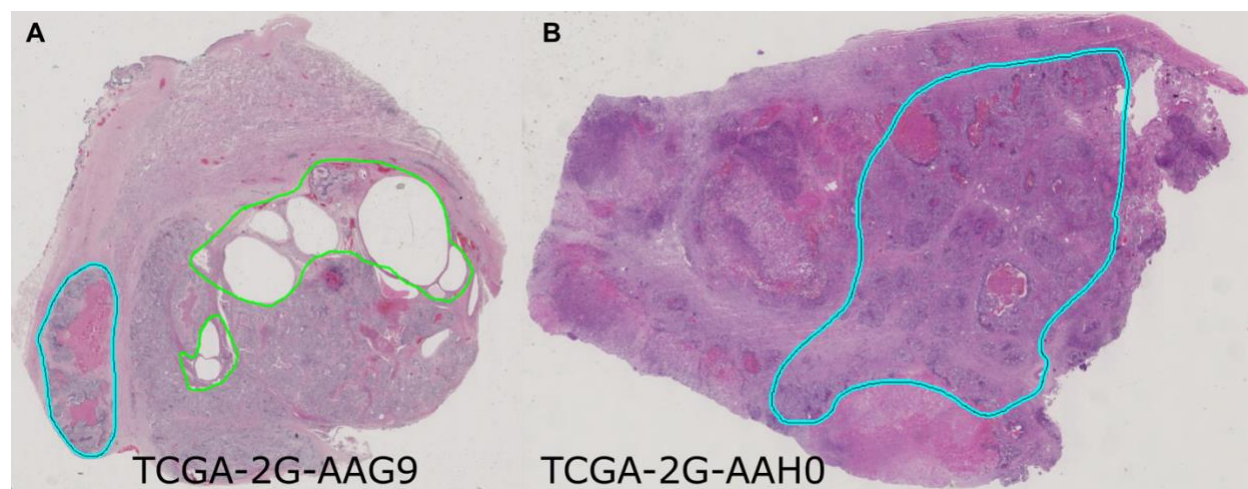

313 Figure 1

314

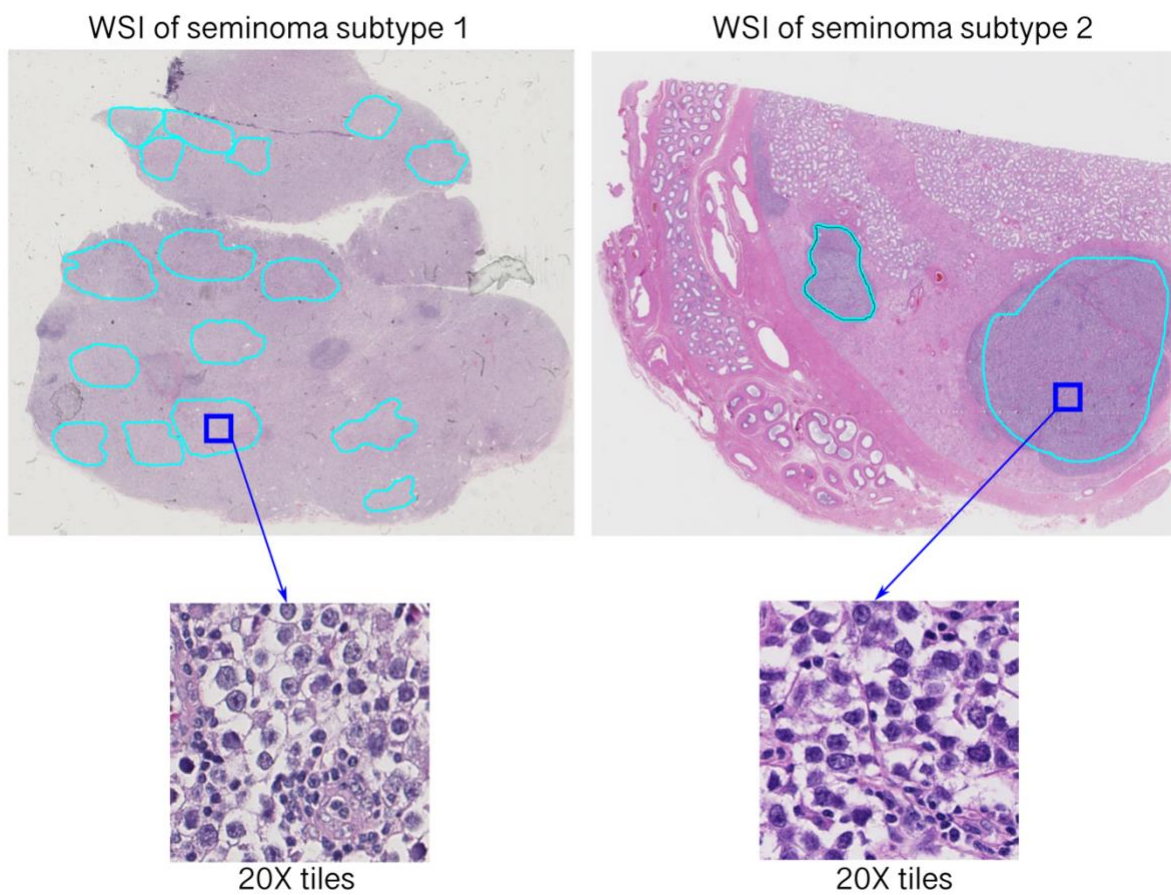

315

316 Figure 2

317

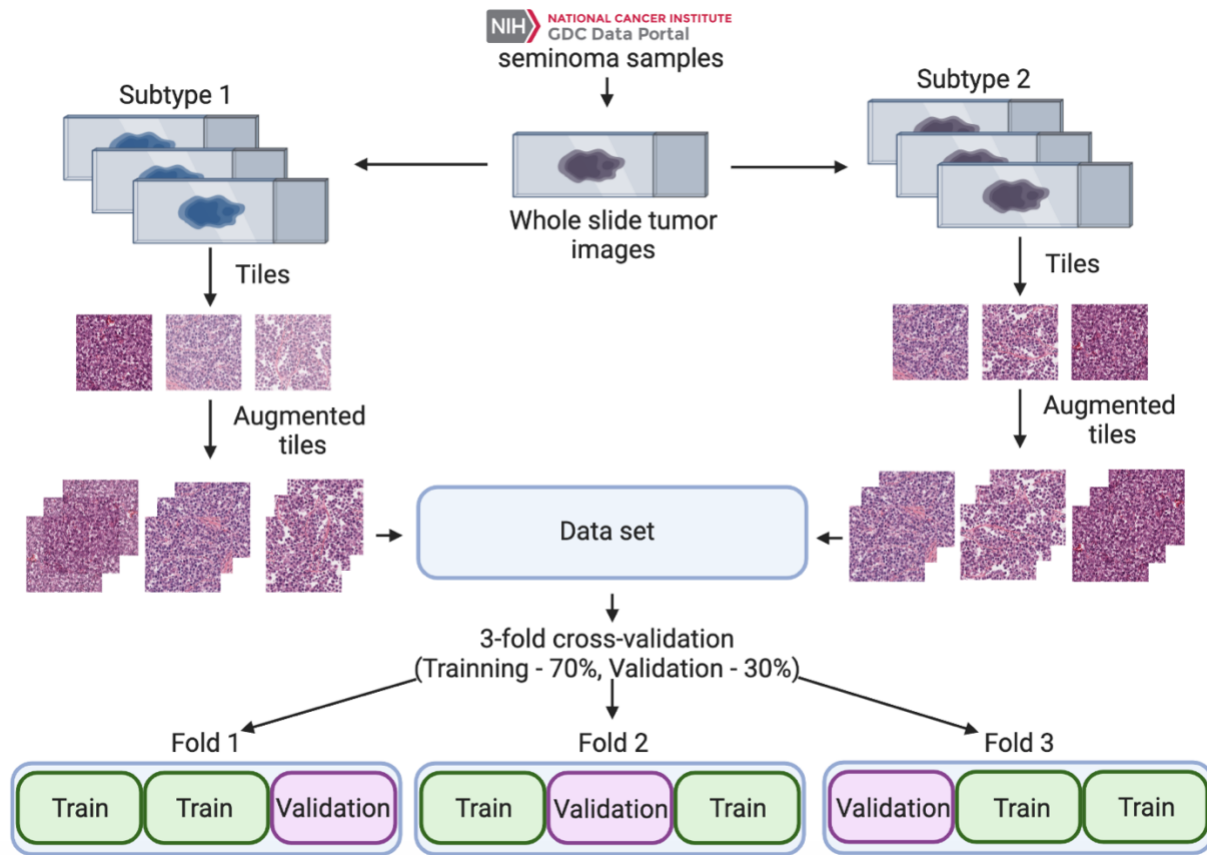

318

319 Figure 3

320

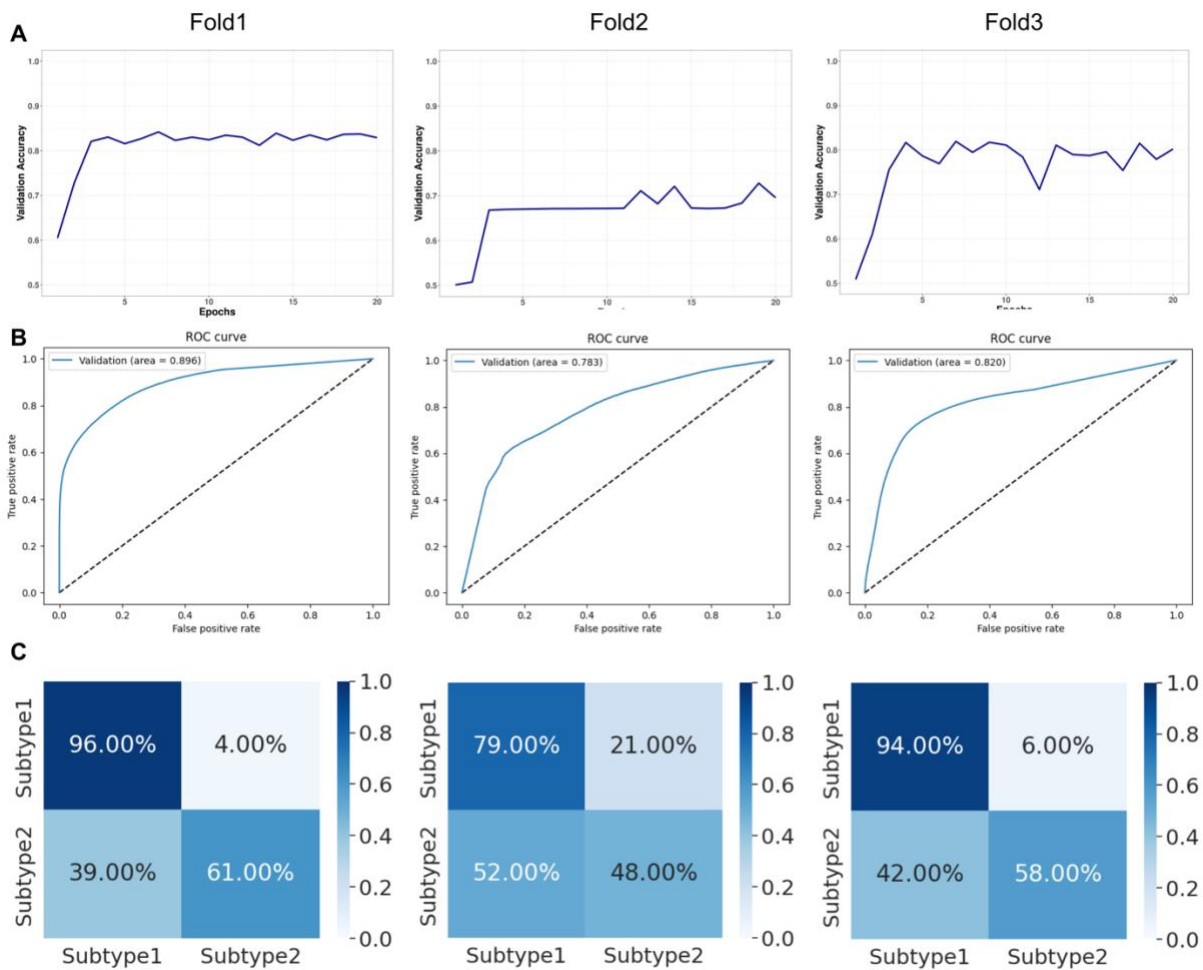

321

322 Figure 4

323

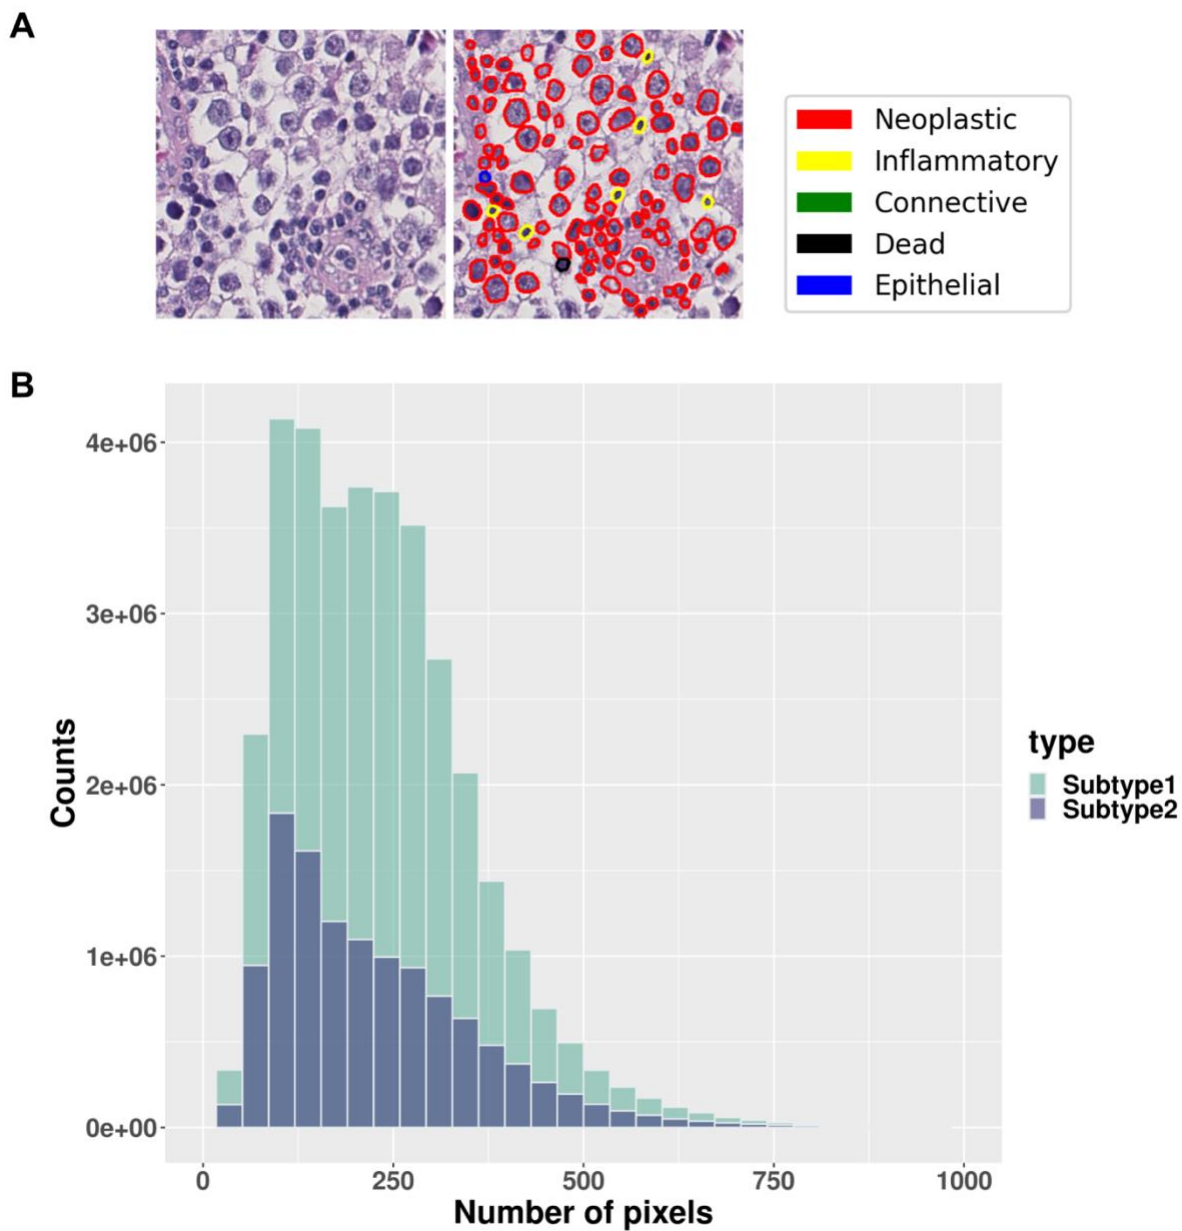

324

325 Figure 5

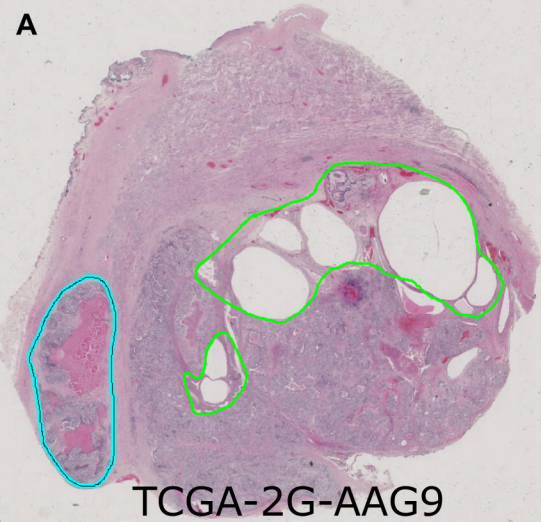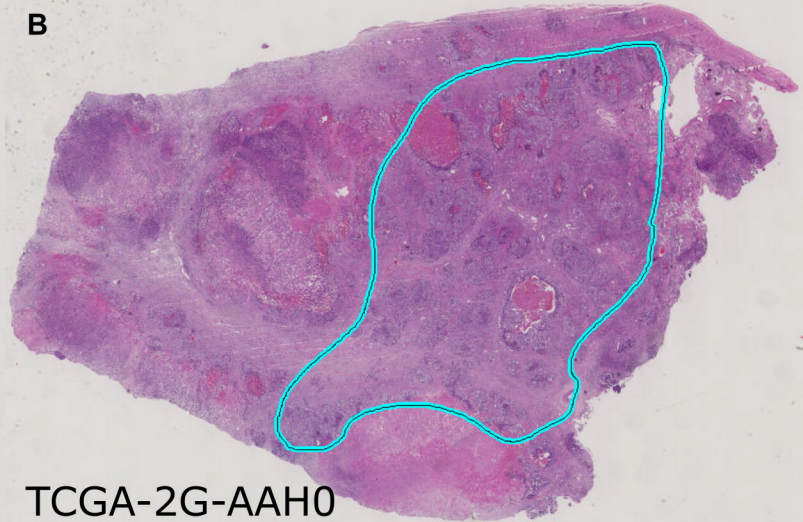

WSI of seminoma subtype 1

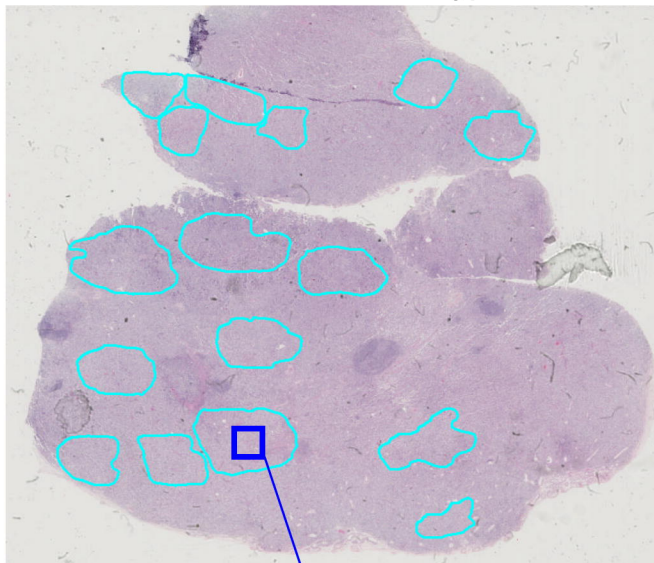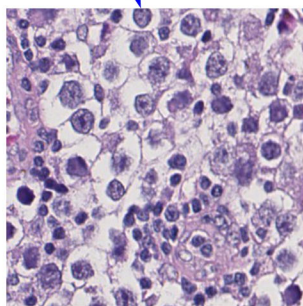

20X tiles

WSI of seminoma subtype 2

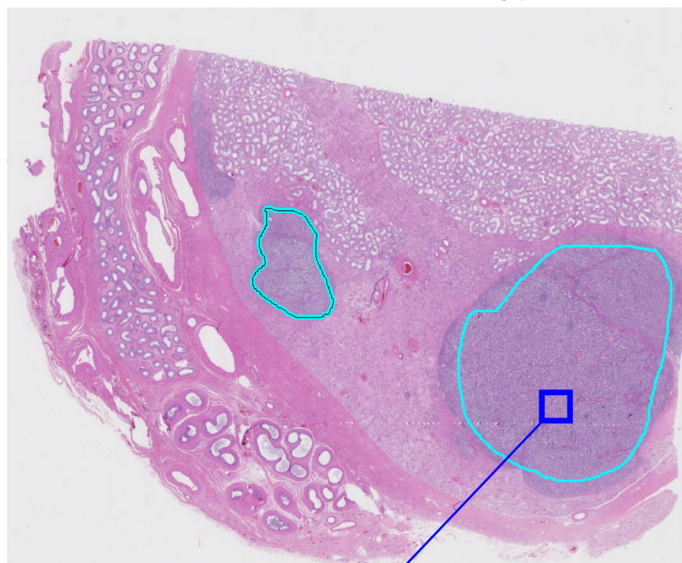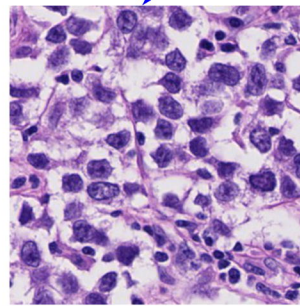

20X tiles

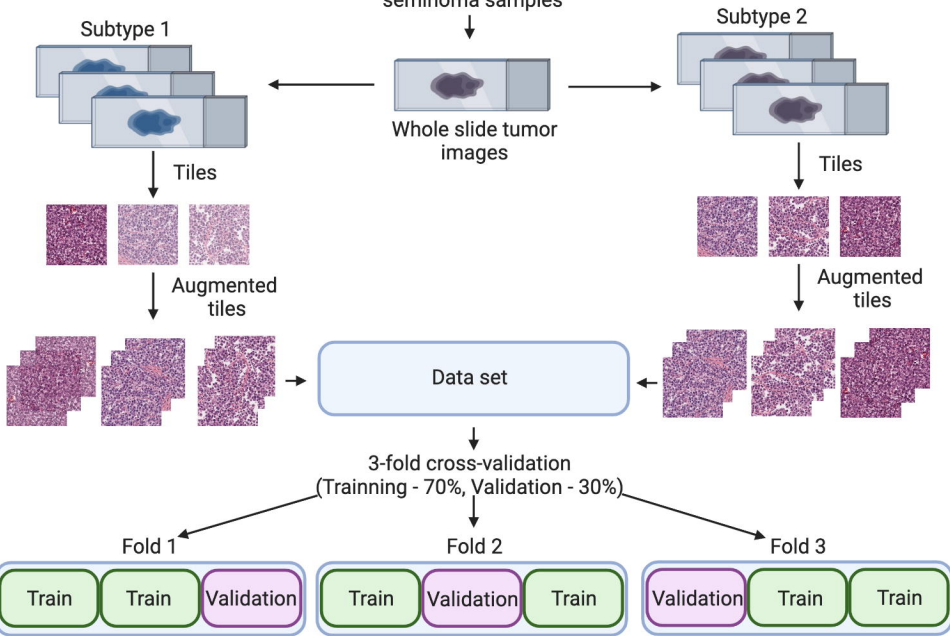



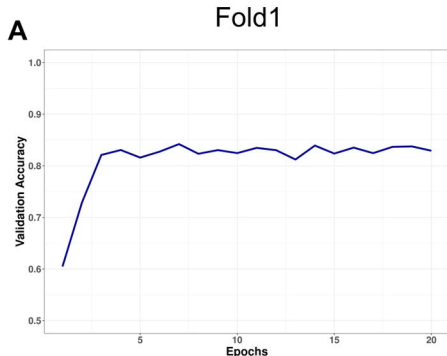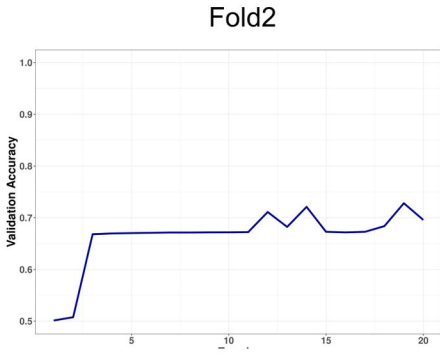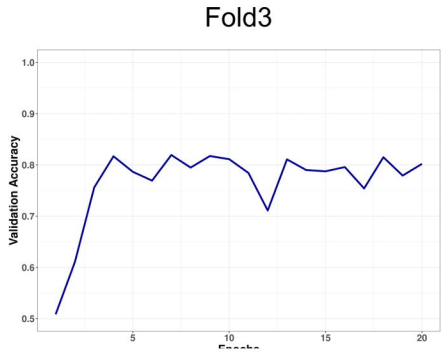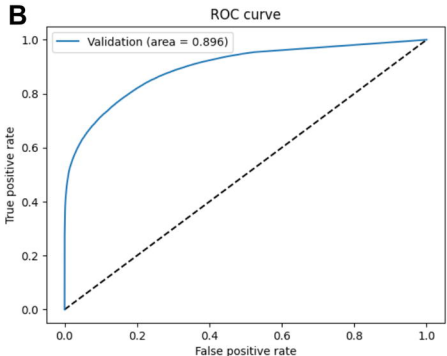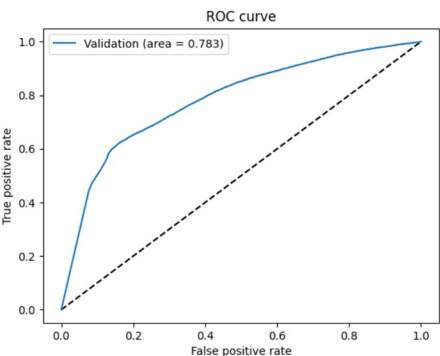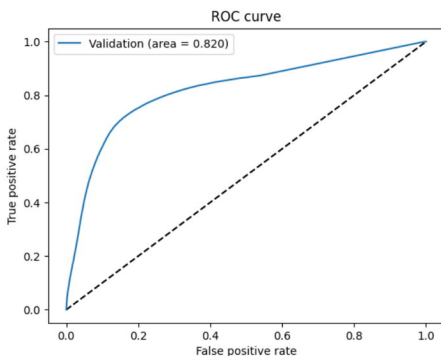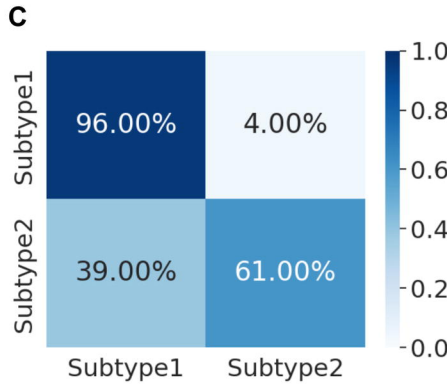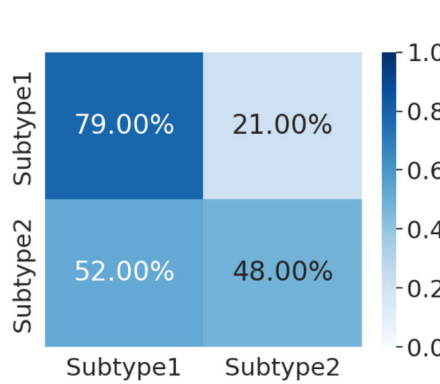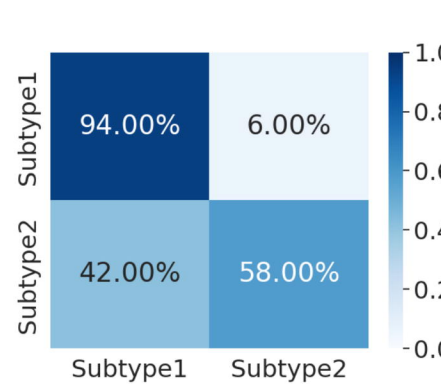

**A**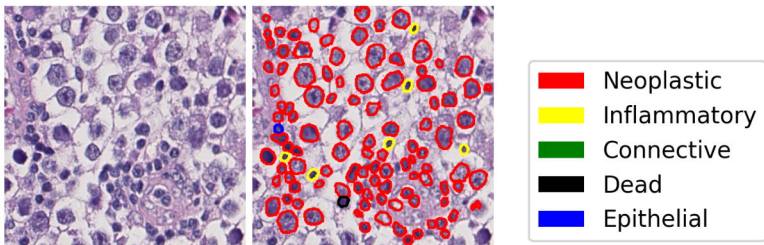**B**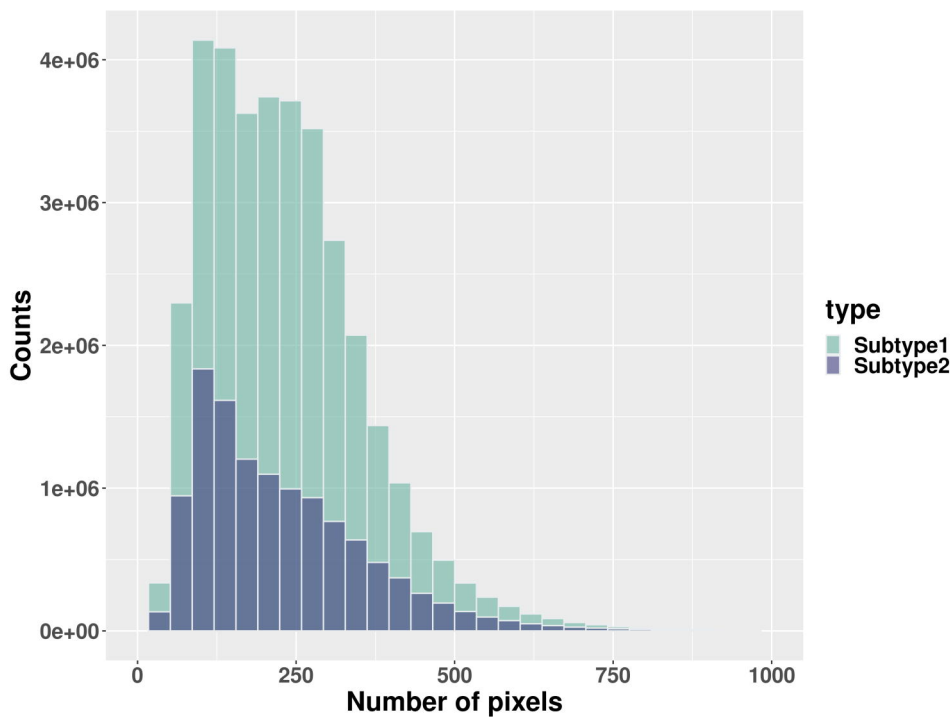

Source: https://medrxiv.org/content/10.1101/2022.05.16.22275153.full.pdf
